# Supplementary material for: Colorectal Cancer Diagnosis: The Obstacles We Face in Determining a Non-Invasive Test and Current Advances in Biomarker Detection
Source: MDPI journal article supplement (doi:10.3390/cancers14081889), 2022-04-08
Supplement: s1 [file s1]

# Colorectal cancer diagnosis: the obstacles we face in determining a non-invasive test and current advances in biomarker detection

Faddy Kamel <sup>1,2</sup>, Khadiga Eltarhoni <sup>1,2</sup>, Pasha Nisar <sup>2,\*</sup> and Mikhail Soloviev <sup>1,\*</sup>

<sup>1</sup> Department of Biological Sciences, Royal Holloway University of London, Egham, Surrey TW20 0EX, UK; faddy.kamel.2018@live.rhul.ac.uk (F.K.); khadiga.eltarhoni.2021@live.rhul.ac.uk (K.E.)

<sup>2</sup> Ashford and St Peter's Hospitals NHS Foundation Trust, Chertsey KT16 0RQ, UK

\* Correspondence: pasha.nisar@nhs.net (P.N.); mikhail.soloviev@rhul.ac.uk (M.S.)

**Table S1.** Upregulated genes in CRC.

| Gene     | Protein                                                | UniProt ID | Protein Name  |
|----------|--------------------------------------------------------|------------|---------------|
| ECHS1    | Enoyl-CoA hydratase, mitochondrial                     | P30084     | (ECHM_HUMAN)  |
| TOP2A    | DNA topoisomerase 2-alpha                              | P11388     | (TOP2A_HUMAN) |
| CXCL12   | Stromal cell-derived factor 1                          | P48061     | (SDF1_HUMAN)  |
| CKS2     | Cyclin-dependent kinases regulatory subunit 2          | P33552     | (CKS2_HUMAN)  |
| TTK      | Dual specificity protein kinase TTK                    | P33981     | (TTK_HUMAN)   |
| NHP2     | H/ACA ribonucleoprotein complex subunit 2              | Q9NX24     | (NHP2_HUMAN)  |
| RAN      | GTP-binding nuclear protein Ran                        | P62826     | (RAN_HUMAN)   |
| FOXO1    | Forkhead box protein O1                                | Q12778     | (FOXO1_HUMAN) |
| CDC6     | Cell division control protein 6 homolog                | Q99741     | (CDC6_HUMAN)  |
| YAP1     | Transcriptional coactivator YAP1                       | P46937     | (YAP1_HUMAN)  |
| CDK1     | Cyclin-dependent kinase 1                              | P06493     | (CDK1_HUMAN)  |
| VEGFA    | Vascular endothelial growth factor A                   | P15692     | (VEGFA_HUMAN) |
| CCNB1    | G2/mitotic-specific cyclin-B1                          | P14635     | (CCNB1_HUMAN) |
| DLGAP5   | Disks large-associated protein 5                       | Q15398     | (DLGP5_HUMAN) |
| CXCL1    | Growth-regulated alpha protein                         | P09341     | (GROA_HUMAN)  |
| ADCY9    | Adenylate cyclase type 9                               | O60503     | (ADCY9_HUMAN) |
| NEK2     | Serine/threonine-protein kinase Nek2                   | P51955     | (NEK2_HUMAN)  |
| NOB1     | RNA-binding protein NOB1                               | Q9ULX3     | (NOB1_HUMAN)  |
| CCL21    | C-C motif chemokine 21                                 | O00585     | (CCL21_HUMAN) |
| PTTG1    | Securin                                                | O95997     | (PTTG1_HUMAN) |
| SERPINE1 | Plasminogen activator inhibitor 1                      | P05121     | (PAI1_HUMAN)  |
| PLK1     | Serine/threonine-protein kinase PLK1                   | P53350     | (PLK1_HUMAN)  |
| MYC      | Myc proto-oncogene protein                             | P01106     | (MYC_HUMAN)   |
| RRM2     | Ribonucleoside-diphosphate reductase subunit M2        | P31350     | (RIR2_HUMAN)  |
| IGF1     | Insulin-like growth factor I                           | P05019     | (IGF1_HUMAN)  |
| CHEK1    | Serine/threonine-protein kinase Chk1                   | O14757     | (CHK1_HUMAN)  |
| GIN51    | DNA replication complex GINS protein PSF1              | Q14691     | (PSF1_HUMAN)  |
| NLRP7    | NACHT, LRR and PYD domains-containing protein 7        | Q8WX94     | (NALP7_HUMAN) |
| EREG     | Proepiregulin                                          | O14944     | (EREG_HUMAN)  |
| UTP14A   | U3 small nucleolar RNA-associated protein 14 homolog A | Q9BVJ6     | (UT14A_HUMAN) |
| ANTXR1   | Anthrax toxin receptor 1                               | Q9H6X2     | (ANTR1_HUMAN) |
| ASF1A    | Histone chaperone ASF1A                                | Q9Y294     | (ASF1A_HUMAN) |
| TIMP1    | Metalloproteinase inhibitor 1                          | P01033     | (TIMP1_HUMAN) |
| CEP55    | Centrosomal protein of 55 kDa                          | Q53EZ4     | (CEP55_HUMAN) |
| SFTA2    | Surfactant-associated protein 2                        | Q6UW10     | (SFTA2_HUMAN) |
| AMH      | Muellerian-inhibiting factor                           | P03971     | (MIS_HUMAN)   |
| MYH2     | Myosin-2                                               | Q9UKX2     | (MYH2_HUMAN)  |

|         |                                                                   |        |               |
|---------|-------------------------------------------------------------------|--------|---------------|
| POU4F1  | POU domain, class 4, transcription factor 1                       | Q01851 | (PO4F1_HUMAN) |
| SIX4    | Homeobox protein SIX4                                             | Q9UIU6 | (SIX4_HUMAN)  |
| INHBA   | Inhibin beta A chain                                              | P08476 | (INHBA_HUMAN) |
| ESM1    | Endothelial cell-specific molecule 1                              | Q9NQ30 | (ESM1_HUMAN)  |
| SLC10A1 | Sodium/bile acid cotransporter                                    | Q14973 | (NTCP_HUMAN)  |
| MAPT    | Microtubule-associated protein tau                                | P10636 | (TAU_HUMAN)   |
| DDIT4   | DNA damage-inducible transcript 4 protein                         | Q9NX09 | (DDIT4_HUMAN) |
| TPTE    | Putative tyrosine-protein phosphatase TPTE                        | P56180 | (TPTE_HUMAN)  |
| PAICS   | Multifunctional protein ADE2                                      | P22234 | (PUR6_HUMAN)  |
| CCNA2   | Cyclin-A2                                                         | P20248 | (CCNA2_HUMAN) |
| PAX5    | Paired box protein Pax-5                                          | Q02548 | (PAX5_HUMAN)  |
| CXCL3   | C-X-C motif chemokine 3                                           | P19876 | (CXCL3_HUMAN) |
| CXCL11  | C-X-C motif chemokine 11                                          | O14625 | (CXL11_HUMAN) |
| PPBP    | Platelet basic protein                                            | P02775 | (CXCL7_HUMAN) |
| CDC20   | Cell division cycle protein 20 homolog                            | Q12834 | (CDC20_HUMAN) |
| MCM4    | DNA replication licensing factor MCM4                             | P33991 | (MCM4_HUMAN)  |
| CLDN1   | Claudin-1                                                         | O95832 | (CLD1_HUMAN)  |
| SHANK2  | SH3 and multiple ankyrin repeat domains protein 2                 | Q9UPX8 | (SHAN2_HUMAN) |
| PTH1R   | Parathyroid hormone/parathyroid hormone-related peptide receptor  | Q03431 | (PTH1R_HUMAN) |
| C2      | Complement C2                                                     | P06681 | (CO2_HUMAN)   |
| TEAD4   | Transcriptional enhancer factor TEF-3                             | Q15561 | (TEAD4_HUMAN) |
| CXCL8   | Interleukin-8                                                     | P10145 | (IL8_HUMAN)   |
| AQP8    | Aquaporin-8                                                       | O94778 | (AQP8_HUMAN)  |
| PBX4    | Pre-B-cell leukemia transcription factor 4                        | Q9BYU1 | (PBX4_HUMAN)  |
| POLR1B  | DNA-directed RNA polymerase I subunit RPA2                        | Q9H9Y6 | (RPA2_HUMAN)  |
| BUB1    | Mitotic checkpoint serine/threonine-protein kinase BUB1           | O43683 | (BUB1_HUMAN)  |
| AURKA   | Aurora kinase A                                                   | O14965 | (AURKA_HUMAN) |
| GNG7    | Guanine nucleotide-binding protein G(I)/G(S)/G(O) subunit gamma-7 | O60262 | (GBG7_HUMAN)  |
| MAD2L1  | Mitotic spindle assembly checkpoint protein MAD2A                 | Q13257 | (MD2L1_HUMAN) |
| PTGS2   | Prostaglandin G/H synthase 2                                      | P35354 | (PGH2_HUMAN)  |
| NMU     | Neuromedin-U                                                      | P48645 | (NMU_HUMAN)   |
| CDC45   | Cell division control protein 45 homolog                          | O75419 | (CDC45_HUMAN) |
| MCM2    | DNA replication licensing factor MCM2                             | P49736 | (MCM2_HUMAN)  |
| SPP1    | Osteopontin                                                       | P10451 | (OSTP_HUMAN)  |
| ASPM    | Abnormal spindle-like microcephaly-associated protein             | Q8IZT6 | (ASPM_HUMAN)  |
| RBM28   | RNA-binding protein 28                                            | Q9NW13 | (RBM28_HUMAN) |
| HEATR1  | HEAT repeat-containing protein 1                                  | Q9H583 | (HEAT1_HUMAN) |
| WDR75   | WD repeat-containing protein 75                                   | Q8IWA0 | (WDR75_HUMAN) |
| CCR2    | C-C chemokine receptor type 2                                     | P41597 | (CCR2_HUMAN)  |
| GNG2    | Guanine nucleotide-binding protein G(I)/G(S)/G(O) subunit gamma-2 | P59768 | (GBG2_HUMAN)  |
| TMEM270 | Transmembrane protein 270                                         | Q6UE05 | (TM270_HUMAN) |
| ACAA2   | 3-ketoacyl-CoA thiolase, mitochondrial                            | P42765 | (THIM_HUMAN)  |
| PGPEP1L | Pyroglutamyl-peptidase 1-like protein                             | A6NFU8 | (PGPIL_HUMAN) |
| NOP58   | Nucleolar protein 58                                              | Q9Y2X3 | (NOP58_HUMAN) |
| WDR3    | WD repeat-containing protein 3                                    | Q9UNX4 | (WDR3_HUMAN)  |
| RPP40   | Ribonuclease P protein subunit p40                                | O75818 | (RPP40_HUMAN) |
| GTPBP4  | GTP-binding protein 4                                             | Q9BZE4 | (GTPB4_HUMAN) |
| WDR43   | WD repeat-containing protein 43                                   | Q15061 | (WDR43_HUMAN) |
| POLR1C  | DNA-directed RNA polymerases I and III subunit RPAC1              | O15160 | (RPAC1_HUMAN) |
| POLR1D  | DNA-directed RNA polymerases I and III subunit RPAC2              | P0DPB6 | (RPAC2_HUMAN) |
| METTL3  | N6-adenosine-methyltransferase catalytic subunit                  | Q86U44 | (MTA70_HUMAN) |

**Table S2.** Top Biological pathways among the 102 CRC markers.

| Gene           | Pathway counts* | GO - Biological Process**                                                                    |
|----------------|-----------------|----------------------------------------------------------------------------------------------|
| <b>NDRG1</b>   | <b>11</b>       | GO:0007165 [signal transduction]                                                             |
|                | <b>10</b>       | GO:0008285 [negative regulation of cell proliferation]                                       |
|                | <b>7</b>        | GO:0071456 [cellular response to hypoxia]                                                    |
|                | <b>1</b>        | GO:0010038 [response to metal ion]                                                           |
|                | <b>1</b>        | GO:0032287 [peripheral nervous system myelin maintenance]                                    |
| <b>PRKACV</b>  | -               | -                                                                                            |
| <b>CAB39</b>   | <b>11</b>       | GO:0007165 [signal transduction]                                                             |
|                | <b>5</b>        | GO:0018105 [peptidyl-serine phosphorylation]                                                 |
|                | <b>5</b>        | GO:0035556 [intracellular signal transduction]                                               |
|                | <b>2</b>        | GO:0032147 [activation of protein kinase activity]                                           |
|                | <b>2</b>        | GO:0014823 [response to activity]                                                            |
| <b>CFLAR</b>   | <b>13</b>       | GO:0043066 [negative regulation of apoptotic process]                                        |
|                | <b>8</b>        | GO:0006915 [apoptotic process]                                                               |
|                | <b>7</b>        | GO:0071456 [cellular response to hypoxia]                                                    |
|                | <b>4</b>        | GO:0006508 [proteolysis]                                                                     |
|                | <b>4</b>        | GO:2001237 [negative regulation of extrinsic apoptotic signaling pathway]                    |
| <b>CTSC</b>    | <b>8</b>        | GO:0006915 [apoptotic process]                                                               |
|                | <b>6</b>        | GO:0007568 [aging]                                                                           |
|                | <b>5</b>        | GO:0006955 [immune response]                                                                 |
|                | <b>4</b>        | GO:0006508 [proteolysis]                                                                     |
|                | <b>2</b>        | GO:0010033 [response to organic substance]                                                   |
| <b>THBS1</b>   | <b>13</b>       | GO:0043066 [negative regulation of apoptotic process]                                        |
|                | <b>11</b>       | GO:0008284 [positive regulation of cell proliferation]                                       |
|                | <b>10</b>       | GO:0006954 [inflammatory response]                                                           |
|                | <b>10</b>       | GO:0008285 [negative regulation of cell proliferation]                                       |
|                | <b>8</b>        | GO:0009410 [response to xenobiotic stimulus]                                                 |
| <b>TRAPPC3</b> | <b>1</b>        | GO:0006888 [ER to Golgi vesicle-mediated transport]                                          |
|                | <b>1</b>        | GO:0006891 [intra-Golgi vesicle-mediated transport]                                          |
| <b>EIF4E3</b>  | <b>1</b>        | GO:0006413 [translational initiation]                                                        |
|                | <b>1</b>        | GO:0006417 [regulation of translation]                                                       |
| <b>PTK6</b>    | <b>8</b>        | GO:0006468 [protein phosphorylation]                                                         |
|                | <b>4</b>        | GO:0046777 [protein autophosphorylation]                                                     |
|                | <b>3</b>        | GO:0042531 [positive regulation of tyrosine phosphorylation of STAT protein]                 |
|                | <b>3</b>        | GO:0030154 [cell differentiation]                                                            |
|                | <b>3</b>        | GO:0071300 [cellular response to retinoic acid]                                              |
| <b>PHLPP2</b>  | <b>11</b>       | GO:0007165 [signal transduction]                                                             |
|                | <b>2</b>        | GO:0021766 [hippocampus development]                                                         |
|                | <b>1</b>        | GO:0006470 [protein dephosphorylation]                                                       |
| <b>CBX7</b>    | <b>8</b>        | GO:0009410 [response to xenobiotic stimulus]                                                 |
|                | <b>8</b>        | GO:0000122 [negative regulation of transcription from RNA polymerase II promoter]            |
|                | <b>1</b>        | GO:0032968 [positive regulation of transcription elongation from RNA polymerase II promoter] |
|                | <b>1</b>        | GO:0006325 [chromatin organization]                                                          |
|                | <b>1</b>        | GO:0003006 [developmental process involved in reproduction]                                  |
| <b>LPAR1</b>   | <b>10</b>       | GO:0007186 [G-protein coupled receptor signaling pathway]                                    |
|                | <b>4</b>        | GO:0007189 [adenylate cyclase-activating G-protein coupled receptor signaling pathway]       |
|                | <b>4</b>        | GO:0060326 [cell chemotaxis]                                                                 |
|                | <b>3</b>        | GO:0043123 [positive regulation of I-kappaB kinase/NF-kappaB signaling]                      |
|                | <b>2</b>        | GO:0043410 [positive regulation of MAPK cascade]                                             |

|               |           |                                                                                                                                                                  |
|---------------|-----------|------------------------------------------------------------------------------------------------------------------------------------------------------------------|
| <b>RCL1</b>   | <b>2</b>  | GO:0000447 [endonucleolytic cleavage in ITS1 to separate SSU-rRNA from 5.8S rRNA and LSU-rRNA from tricistronic rRNA transcript (SSU-rRNA, 5.8S rRNA, LSU-rRNA)] |
|               | <b>1</b>  | GO:0000479 [endonucleolytic cleavage of tricistronic rRNA transcript (SSU-rRNA, 5.8S rRNA, LSU-rRNA)]                                                            |
|               | <b>1</b>  | GO:0008150 [biological_process]                                                                                                                                  |
|               | <b>1</b>  | GO:0000480 [endonucleolytic cleavage in 5'-ETS of tricistronic rRNA transcript (SSU-rRNA, 5.8S rRNA, LSU-rRNA)]                                                  |
| <b>ZG16</b>   | <b>1</b>  | GO:0050830 [defense response to Gram-positive bacterium]                                                                                                         |
|               | <b>1</b>  | GO:0052373 [negative regulation by organism of entry into other organism involved in symbiotic interaction]                                                      |
|               | <b>1</b>  | GO:0015031 [protein transport]                                                                                                                                   |
| <b>ECHS1</b>  | <b>2</b>  | GO:0006635 [fatty acid beta-oxidation]                                                                                                                           |
|               | <b>1</b>  | GO:0009083 [branched-chain amino acid catabolic process]                                                                                                         |
| <b>TOP2A</b>  | <b>11</b> | GO:0045944 [positive regulation of transcription from RNA polymerase II promoter]                                                                                |
|               | <b>6</b>  | GO:0006974 [cellular response to DNA damage stimulus]                                                                                                            |
|               | <b>4</b>  | GO:0043065 [positive regulation of apoptotic process]                                                                                                            |
|               | <b>4</b>  | GO:0007059 [chromosome segregation]                                                                                                                              |
|               | <b>2</b>  | GO:0007143 [female meiotic division]                                                                                                                             |
|               | <b>11</b> | GO:0007165 [signal transduction]                                                                                                                                 |
| <b>CXCL12</b> | <b>10</b> | GO:0007186 [G-protein coupled receptor signaling pathway]                                                                                                        |
|               | <b>8</b>  | GO:0070098 [chemokine-mediated signaling pathway]                                                                                                                |
|               | <b>5</b>  | GO:0006955 [immune response]                                                                                                                                     |
|               | <b>5</b>  | GO:0030335 [positive regulation of cell migration]                                                                                                               |
|               | <b>12</b> | GO:0051301 [cell division]                                                                                                                                       |
| <b>CKS2</b>   | <b>9</b>  | GO:0006357 [regulation of transcription from RNA polymerase II promoter]                                                                                         |
|               | <b>7</b>  | GO:0008283 [cell proliferation]                                                                                                                                  |
|               | <b>4</b>  | GO:0007346 [regulation of mitotic cell cycle]                                                                                                                    |
|               | <b>3</b>  | GO:0044772 [mitotic cell cycle phase transition]                                                                                                                 |
|               | <b>11</b> | GO:0008284 [positive regulation of cell proliferation]                                                                                                           |
| <b>TTK</b>    | <b>6</b>  | GO:0007052 [mitotic spindle organization]                                                                                                                        |
|               | <b>5</b>  | GO:0018105 [peptidyl-serine phosphorylation]                                                                                                                     |
|               | <b>4</b>  | GO:0007094 [mitotic spindle assembly checkpoint]                                                                                                                 |
|               | <b>4</b>  | GO:0007059 [chromosome segregation]                                                                                                                              |
|               | <b>2</b>  | GO:0000469 [cleavage involved in rRNA processing]                                                                                                                |
| <b>NHP2</b>   | <b>1</b>  | GO:0000470 [maturation of LSU-rRNA]                                                                                                                              |
|               | <b>1</b>  | GO:0000454 [snoRNA guided rRNA pseudouridine synthesis]                                                                                                          |
|               | <b>1</b>  | GO:0031120 [snRNA pseudouridine synthesis]                                                                                                                       |
|               | <b>1</b>  | GO:1904874 [positive regulation of telomerase RNA localization to Cajal body]                                                                                    |
|               | <b>12</b> | GO:0051301 [cell division]                                                                                                                                       |
| <b>RAN</b>    | <b>6</b>  | GO:0007052 [mitotic spindle organization]                                                                                                                        |
|               | <b>5</b>  | GO:0000278 [mitotic cell cycle]                                                                                                                                  |
|               | <b>4</b>  | GO:0000070 [mitotic sister chromatid segregation]                                                                                                                |
|               | <b>3</b>  | GO:0042307 [positive regulation of protein import into nucleus]                                                                                                  |
|               | <b>13</b> | GO:0043066 [negative regulation of apoptotic process]                                                                                                            |
| <b>FOXO1</b>  | <b>11</b> | GO:0045944 [positive regulation of transcription from RNA polymerase II promoter]                                                                                |
|               | <b>9</b>  | GO:0006357 [regulation of transcription from RNA polymerase II promoter]                                                                                         |
|               | <b>9</b>  | GO:0045893 [positive regulation of transcription, DNA-templated]                                                                                                 |
|               | <b>8</b>  | GO:0000122 [negative regulation of transcription from RNA polymerase II promoter]                                                                                |
|               | <b>12</b> | GO:0051301 [cell division]                                                                                                                                       |
| <b>CDC6</b>   | <b>10</b> | GO:0008285 [negative regulation of cell proliferation]                                                                                                           |
|               | <b>6</b>  | GO:0048146 [positive regulation of fibroblast proliferation]                                                                                                     |
|               | <b>5</b>  | GO:0000278 [mitotic cell cycle]                                                                                                                                  |
|               | <b>4</b>  | GO:0000079 [regulation of cyclin-dependent protein serine/threonine kinase activity]                                                                             |

|               |           |                                                                                        |
|---------------|-----------|----------------------------------------------------------------------------------------|
| <b>YAP1</b>   | <b>11</b> | GO:0045944 [positive regulation of transcription from RNA polymerase II promoter]      |
|               | <b>9</b>  | GO:0010628 [positive regulation of gene expression]                                    |
|               | <b>9</b>  | GO:0010629 [negative regulation of gene expression]                                    |
|               | <b>9</b>  | GO:0045893 [positive regulation of transcription, DNA-templated]                       |
|               | <b>8</b>  | GO:0000122 [negative regulation of transcription from RNA polymerase II promoter]      |
| <b>CDK1</b>   | <b>13</b> | GO:0043066 [negative regulation of apoptotic process]                                  |
|               | <b>12</b> | GO:0051301 [cell division]                                                             |
|               | <b>9</b>  | GO:0010629 [negative regulation of gene expression]                                    |
|               | <b>9</b>  | GO:0010628 [positive regulation of gene expression]                                    |
|               | <b>8</b>  | GO:0009410 [response to xenobiotic stimulus]                                           |
| <b>VEGFA</b>  | <b>13</b> | GO:0043066 [negative regulation of apoptotic process]                                  |
|               | <b>11</b> | GO:0008284 [positive regulation of cell proliferation]                                 |
|               | <b>11</b> | GO:0045944 [positive regulation of transcription from RNA polymerase II promoter]      |
|               | <b>9</b>  | GO:0010629 [negative regulation of gene expression]                                    |
|               | <b>9</b>  | GO:0010628 [positive regulation of gene expression]                                    |
| <b>CCNB1</b>  | <b>12</b> | GO:0051301 [cell division]                                                             |
|               | <b>8</b>  | GO:0006468 [protein phosphorylation]                                                   |
|               | <b>6</b>  | GO:0048146 [positive regulation of fibroblast proliferation]                           |
|               | <b>6</b>  | GO:0007052 [mitotic spindle organization]                                              |
|               | <b>5</b>  | GO:0001701 [in utero embryonic development]                                            |
| <b>DLGAP5</b> | <b>6</b>  | GO:0007052 [mitotic spindle organization]                                              |
|               | <b>4</b>  | GO:0007346 [regulation of mitotic cell cycle]                                          |
|               | <b>4</b>  | GO:0007059 [chromosome segregation]                                                    |
|               | <b>2</b>  | GO:0051642 [centrosome localization]                                                   |
|               | <b>1</b>  | GO:0023052 [signaling]                                                                 |
| <b>CXCL1</b>  | <b>11</b> | GO:0007165 [signal transduction]                                                       |
|               | <b>10</b> | GO:0007186 [G-protein coupled receptor signaling pathway]                              |
|               | <b>10</b> | GO:0006954 [inflammatory response]                                                     |
|               | <b>10</b> | GO:0008285 [negative regulation of cell proliferation]                                 |
|               | <b>8</b>  | GO:0070098 [chemokine-mediated signaling pathway]                                      |
| <b>ADCY9</b>  | <b>11</b> | GO:0007165 [signal transduction]                                                       |
|               | <b>5</b>  | GO:0001701 [in utero embryonic development]                                            |
|               | <b>5</b>  | GO:0035556 [intracellular signal transduction]                                         |
|               | <b>4</b>  | GO:0007189 [adenylate cyclase-activating G-protein coupled receptor signaling pathway] |
|               | <b>1</b>  | GO:0071880 [adenylate cyclase-activating adrenergic receptor signaling pathway]        |
| <b>NEK2</b>   | <b>12</b> | GO:0051301 [cell division]                                                             |
|               | <b>8</b>  | GO:0006468 [protein phosphorylation]                                                   |
|               | <b>5</b>  | GO:0000278 [mitotic cell cycle]                                                        |
|               | <b>4</b>  | GO:0007059 [chromosome segregation]                                                    |
|               | <b>4</b>  | GO:0046777 [protein autophosphorylation]                                               |
| <b>NOB1</b>   | <b>5</b>  | GO:0006364 [rRNA processing]                                                           |
|               | <b>2</b>  | GO:0000469 [cleavage involved in rRNA processing]                                      |
|               | <b>2</b>  | GO:0030490 [maturation of SSU-rRNA]                                                    |
|               | <b>1</b>  | GO:0090502 [RNA phosphodiester bond hydrolysis, endonucleolytic]                       |
|               | <b>1</b>  | GO:0007601 [visual perception]                                                         |
| <b>CCL21</b>  | <b>10</b> | GO:0006954 [inflammatory response]                                                     |
|               | <b>10</b> | GO:0007186 [G-protein coupled receptor signaling pathway]                              |
|               | <b>8</b>  | GO:0070098 [chemokine-mediated signaling pathway]                                      |
|               | <b>6</b>  | GO:0007267 [cell-cell signaling]                                                       |
|               | <b>6</b>  | GO:0030593 [neutrophil chemotaxis]                                                     |
| <b>PTTG1</b>  | <b>12</b> | GO:0051301 [cell division]                                                             |
|               | <b>4</b>  | GO:0006281 [DNA repair]                                                                |
|               | <b>4</b>  | GO:0007283 [spermatogenesis]                                                           |
|               | <b>4</b>  | GO:0010951 [negative regulation of endopeptidase activity]                             |
|               | <b>2</b>  | GO:0051276 [chromosome organization]                                                   |

|                 |    |                                                                                   |
|-----------------|----|-----------------------------------------------------------------------------------|
| <b>SERPINE1</b> | 7  | GO:0071222 [cellular response to lipopolysaccharide]                              |
|                 | 6  | GO:0001525 [angiogenesis]                                                         |
|                 | 4  | GO:0045766 [positive regulation of angiogenesis]                                  |
|                 | 4  | GO:0010951 [negative regulation of endopeptidase activity]                        |
|                 | 3  | GO:0090026 [positive regulation of monocyte chemotaxis]                           |
| <b>PLK1</b>     | 13 | GO:0043066 [negative regulation of apoptotic process]                             |
|                 | 8  | GO:0000122 [negative regulation of transcription from RNA polymerase II promoter] |
|                 | 8  | GO:0006468 [protein phosphorylation]                                              |
|                 | 6  | GO:0007052 [mitotic spindle organization]                                         |
|                 | 5  | GO:0000086 [G2/M transition of mitotic cell cycle]                                |
| <b>MYC</b>      | 13 | GO:0043066 [negative regulation of apoptotic process]                             |
|                 | 11 | GO:0008284 [positive regulation of cell proliferation]                            |
|                 | 11 | GO:0045944 [positive regulation of transcription from RNA polymerase II promoter] |
|                 | 9  | GO:0010628 [positive regulation of gene expression]                               |
|                 | 9  | GO:0045893 [positive regulation of transcription, DNA-templated]                  |
| <b>RRM2</b>     | 5  | GO:0006260 [DNA replication]                                                      |
|                 | 2  | GO:0001824 [blastocyst development]                                               |
|                 | 1  | GO:0009263 [deoxyribonucleotide biosynthetic process]                             |
|                 | 1  | GO:0051290 [protein heterotetramerization]                                        |
|                 | 1  | GO:0009185 [ribonucleoside diphosphate metabolic process]                         |
| <b>IGF1</b>     | 13 | GO:0043066 [negative regulation of apoptotic process]                             |
|                 | 11 | GO:0008284 [positive regulation of cell proliferation]                            |
|                 | 11 | GO:0007165 [signal transduction]                                                  |
|                 | 11 | GO:0045944 [positive regulation of transcription from RNA polymerase II promoter] |
|                 | 9  | GO:0010629 [negative regulation of gene expression]                               |
| <b>CHEK1</b>    | 8  | GO:0006468 [protein phosphorylation]                                              |
|                 | 8  | GO:0006915 [apoptotic process]                                                    |
|                 | 6  | GO:0006974 [cellular response to DNA damage stimulus]                             |
|                 | 5  | GO:0000086 [G2/M transition of mitotic cell cycle]                                |
|                 | 5  | GO:0006260 [DNA replication]                                                      |
| <b>GIN51</b>    | -  | -                                                                                 |
| <b>NLRP7</b>    | 7  | GO:0071222 [cellular response to lipopolysaccharide]                              |
|                 | 4  | GO:0010951 [negative regulation of endopeptidase activity]                        |
|                 | 4  | GO:0071347 [cellular response to interleukin-1]                                   |
|                 | 2  | GO:0032691 [negative regulation of interleukin-1 beta production]                 |
|                 | 1  | GO:0010955 [negative regulation of protein processing]                            |
| <b>EREG</b>     | 11 | GO:0008284 [positive regulation of cell proliferation]                            |
|                 | 10 | GO:0008285 [negative regulation of cell proliferation]                            |
|                 | 6  | GO:0048146 [positive regulation of fibroblast proliferation]                      |
|                 | 6  | GO:0001525 [angiogenesis]                                                         |
|                 | 6  | GO:0007267 [cell-cell signaling]                                                  |
| <b>UTP14A</b>   | 5  | GO:0006364 [rRNA processing]                                                      |
| <b>ANTXR1</b>   | 2  | GO:0001568 [blood vessel development]                                             |
|                 | 1  | GO:0034446 [substrate adhesion-dependent cell spreading]                          |
|                 | 1  | GO:1901998 [toxin transport]                                                      |
|                 | 1  | GO:0031532 [actin cytoskeleton reorganization]                                    |
|                 | 1  | GO:1901202 [negative regulation of extracellular matrix assembly]                 |
| <b>ASF1A</b>    | 4  | GO:0006281 [DNA repair]                                                           |
|                 | 3  | GO:0001649 [osteoblast differentiation]                                           |
|                 | 2  | GO:0006334 [nucleosome assembly]                                                  |
|                 | 1  | GO:0006335 [DNA replication-dependent nucleosome assembly]                        |
|                 | 1  | GO:0006336 [DNA replication-independent nucleosome assembly]                      |

|                |           |                                                                                         |
|----------------|-----------|-----------------------------------------------------------------------------------------|
| <b>TIMP1</b>   | <b>13</b> | GO:0043066 [negative regulation of apoptotic process]                                   |
|                | <b>11</b> | GO:0007165 [signal transduction]                                                        |
|                | <b>11</b> | GO:0008284 [positive regulation of cell proliferation]                                  |
|                | <b>6</b>  | GO:0007568 [aging]                                                                      |
|                | <b>4</b>  | GO:0010951 [negative regulation of endopeptidase activity]                              |
| <b>CEP55</b>   | <b>2</b>  | GO:0045184 [establishment of protein localization]                                      |
|                | <b>2</b>  | GO:0007080 [mitotic metaphase plate congression]                                        |
|                | <b>2</b>  | GO:0006997 [nucleus organization]                                                       |
|                | <b>2</b>  | GO:0000281 [mitotic cytokinesis]                                                        |
|                | <b>1</b>  | GO:0014066 [regulation of phosphatidylinositol 3-kinase signaling]                      |
| <b>SFTA2</b>   |           | -                                                                                       |
| <b>AMH</b>     | <b>9</b>  | GO:0010628 [positive regulation of gene expression]                                     |
|                | <b>8</b>  | GO:0009410 [response to xenobiotic stimulus]                                            |
|                | <b>6</b>  | GO:0007568 [aging]                                                                      |
|                | <b>6</b>  | GO:0007267 [cell-cell signaling]                                                        |
|                | <b>4</b>  | GO:0001541 [ovarian follicle development]                                               |
| <b>MYH2</b>    | <b>1</b>  | GO:0006936 [muscle contraction]                                                         |
|                | <b>1</b>  | GO:0030049 [muscle filament sliding]                                                    |
| <b>POU4F1</b>  | <b>13</b> | GO:0043066 [negative regulation of apoptotic process]                                   |
|                | <b>11</b> | GO:0045944 [positive regulation of transcription from RNA polymerase II promoter]       |
|                | <b>9</b>  | GO:0006357 [regulation of transcription from RNA polymerase II promoter]                |
|                | <b>9</b>  | GO:0010628 [positive regulation of gene expression]                                     |
|                | <b>9</b>  | GO:0010629 [negative regulation of gene expression]                                     |
| <b>SIX4</b>    | <b>13</b> | GO:0043066 [negative regulation of apoptotic process]                                   |
|                | <b>11</b> | GO:0045944 [positive regulation of transcription from RNA polymerase II promoter]       |
|                | <b>9</b>  | GO:0006357 [regulation of transcription from RNA polymerase II promoter]                |
|                | <b>9</b>  | GO:0045893 [positive regulation of transcription, DNA-templated]                        |
|                | <b>3</b>  | GO:0008584 [male gonad development]                                                     |
| <b>INHBA</b>   | <b>11</b> | GO:0045944 [positive regulation of transcription from RNA polymerase II promoter]       |
|                | <b>10</b> | GO:0008285 [negative regulation of cell proliferation]                                  |
|                | <b>9</b>  | GO:0010628 [positive regulation of gene expression]                                     |
|                | <b>9</b>  | GO:0045893 [positive regulation of transcription, DNA-templated]                        |
|                | <b>9</b>  | GO:0006357 [regulation of transcription from RNA polymerase II promoter]                |
| <b>ESM1</b>    | <b>11</b> | GO:0008284 [positive regulation of cell proliferation]                                  |
|                | <b>6</b>  | GO:0001525 [angiogenesis]                                                               |
|                | <b>3</b>  | GO:0002040 [sprouting angiogenesis]                                                     |
|                | <b>1</b>  | GO:1902204 [positive regulation of hepatocyte growth factor receptor signaling pathway] |
| <b>SLC10A1</b> | <b>4</b>  | GO:0045471 [response to ethanol]                                                        |
|                | <b>3</b>  | GO:0046718 [viral entry into host cell]                                                 |
|                | <b>3</b>  | GO:0010468 [regulation of gene expression]                                              |
|                | <b>2</b>  | GO:0071466 [cellular response to xenobiotic stimulus]                                   |
|                | <b>2</b>  | GO:0055085 [transmembrane transport]                                                    |
| <b>MAPT</b>    | <b>9</b>  | GO:0010629 [negative regulation of gene expression]                                     |
|                | <b>6</b>  | GO:0007267 [cell-cell signaling]                                                        |
|                | <b>3</b>  | GO:0034605 [cellular response to heat]                                                  |
|                | <b>2</b>  | GO:0031175 [neuron projection development]                                              |
|                | <b>2</b>  | GO:0007613 [memory]                                                                     |
| <b>DDIT4</b>   | <b>8</b>  | GO:0006915 [apoptotic process]                                                          |
|                | <b>4</b>  | GO:0001666 [response to hypoxia]                                                        |
|                | <b>3</b>  | GO:0007420 [brain development]                                                          |
|                | <b>3</b>  | GO:0001764 [neuron migration]                                                           |
|                | <b>2</b>  | GO:0071549 [cellular response to dexamethasone stimulus]                                |
| <b>TPTE</b>    |           | -                                                                                       |

|               |           |                                                                                      |
|---------------|-----------|--------------------------------------------------------------------------------------|
| <b>PAICS</b>  | <b>1</b>  | GO:0006189 ['de novo' IMP biosynthetic process]                                      |
|               | <b>1</b>  | GO:0006177 [GMP biosynthetic process]                                                |
|               | <b>1</b>  | GO:0044208 ['de novo' AMP biosynthetic process]                                      |
|               | <b>1</b>  | GO:0097294 ['de novo' XMP biosynthetic process]                                      |
|               | <b>1</b>  | GO:0009113 [purine nucleobase biosynthetic process]                                  |
| <b>CCNA2</b>  | <b>12</b> | GO:0051301 [cell division]                                                           |
|               | <b>9</b>  | GO:0045893 [positive regulation of transcription, DNA-templated]                     |
|               | <b>7</b>  | GO:0071456 [cellular response to hypoxia]                                            |
|               | <b>6</b>  | GO:0048146 [positive regulation of fibroblast proliferation]                         |
|               | <b>5</b>  | GO:0000086 [G2/M transition of mitotic cell cycle]                                   |
| <b>PAX5</b>   | <b>11</b> | GO:0045944 [positive regulation of transcription from RNA polymerase II promoter]    |
|               | <b>9</b>  | GO:0006357 [regulation of transcription from RNA polymerase II promoter]             |
|               | <b>8</b>  | GO:0000122 [negative regulation of transcription from RNA polymerase II promoter]    |
|               | <b>6</b>  | GO:0007568 [aging]                                                                   |
|               | <b>4</b>  | GO:0007283 [spermatogenesis]                                                         |
| <b>CXCL3</b>  | <b>10</b> | GO:0006954 [inflammatory response]                                                   |
|               | <b>8</b>  | GO:0070098 [chemokine-mediated signaling pathway]                                    |
|               | <b>7</b>  | GO:0071222 [cellular response to lipopolysaccharide]                                 |
|               | <b>6</b>  | GO:0030593 [neutrophil chemotaxis]                                                   |
|               | <b>5</b>  | GO:0061844 [antimicrobial humoral immune response mediated by antimicrobial peptide] |
| <b>CXCL11</b> | <b>11</b> | GO:0007165 [signal transduction]                                                     |
|               | <b>10</b> | GO:0006954 [inflammatory response]                                                   |
|               | <b>8</b>  | GO:0070098 [chemokine-mediated signaling pathway]                                    |
|               | <b>7</b>  | GO:0071222 [cellular response to lipopolysaccharide]                                 |
|               | <b>6</b>  | GO:0007267 [cell-cell signaling]                                                     |
| <b>PPBP</b>   | <b>10</b> | GO:0006954 [inflammatory response]                                                   |
|               | <b>8</b>  | GO:0070098 [chemokine-mediated signaling pathway]                                    |
|               | <b>7</b>  | GO:0071222 [cellular response to lipopolysaccharide]                                 |
|               | <b>6</b>  | GO:0030593 [neutrophil chemotaxis]                                                   |
|               | <b>5</b>  | GO:0061844 [antimicrobial humoral immune response mediated by antimicrobial peptide] |
|               | <b>1</b>  | GO:0042742 [defense response to bacterium]                                           |
| <b>CDC20</b>  | <b>12</b> | GO:0051301 [cell division]                                                           |
|               | <b>11</b> | GO:0008284 [positive regulation of cell proliferation]                               |
|               | <b>4</b>  | GO:0007399 [nervous system development]                                              |
|               | <b>3</b>  | GO:0030154 [cell differentiation]                                                    |
|               | <b>2</b>  | GO:0031915 [positive regulation of synaptic plasticity]                              |
| <b>MCM4</b>   | <b>5</b>  | GO:0006260 [DNA replication]                                                         |
|               | <b>3</b>  | GO:0006268 [DNA unwinding involved in DNA replication]                               |
|               | <b>3</b>  | GO:0000727 [double-strand break repair via break-induced replication]                |
|               | <b>2</b>  | GO:1902975 [mitotic DNA replication initiation]                                      |
|               | <b>1</b>  | GO:0006271 [DNA strand elongation involved in DNA replication]                       |
| <b>CLDN1</b>  | <b>6</b>  | GO:0007568 [aging]                                                                   |
|               | <b>5</b>  | GO:0030335 [positive regulation of cell migration]                                   |
|               | <b>4</b>  | GO:0007155 [cell adhesion]                                                           |
|               | <b>4</b>  | GO:0071356 [cellular response to tumor necrosis factor]                              |
|               | <b>4</b>  | GO:0045471 [response to ethanol]                                                     |
| <b>SHANK2</b> | <b>11</b> | GO:0008284 [positive regulation of cell proliferation]                               |
|               | <b>8</b>  | GO:0009410 [response to xenobiotic stimulus]                                         |
|               | <b>3</b>  | GO:0007420 [brain development]                                                       |
|               | <b>2</b>  | GO:0008344 [adult locomotory behavior]                                               |
|               | <b>2</b>  | GO:0030534 [adult behavior]                                                          |



|               |           |                                                                                        |
|---------------|-----------|----------------------------------------------------------------------------------------|
| <b>PTH1R</b>  | <b>11</b> | GO:0008284 [positive regulation of cell proliferation]                                 |
|               | <b>10</b> | GO:0008285 [negative regulation of cell proliferation]                                 |
|               | <b>10</b> | GO:0007186 [G-protein coupled receptor signaling pathway]                              |
|               | <b>5</b>  | GO:0001701 [in utero embryonic development]                                            |
|               | <b>4</b>  | GO:0007189 [adenylate cyclase-activating G-protein coupled receptor signaling pathway] |
| <b>C2</b>     | <b>4</b>  | GO:0006508 [proteolysis]                                                               |
|               | <b>3</b>  | GO:0032496 [response to lipopolysaccharide]                                            |
|               | <b>3</b>  | GO:0045087 [innate immune response]                                                    |
|               | <b>2</b>  | GO:0097066 [response to thyroid hormone]                                               |
|               | <b>1</b>  | GO:0006956 [complement activation]                                                     |
| <b>TEAD4</b>  | <b>11</b> | GO:0045944 [positive regulation of transcription from RNA polymerase II promoter]      |
|               | <b>9</b>  | GO:0006357 [regulation of transcription from RNA polymerase II promoter]               |
|               | <b>4</b>  | GO:0007566 [embryo implantation]                                                       |
|               | <b>3</b>  | GO:0001501 [skeletal system development]                                               |
|               | <b>2</b>  | GO:0007517 [muscle organ development]                                                  |
| <b>CXCL8</b>  | <b>11</b> | GO:0007165 [signal transduction]                                                       |
|               | <b>10</b> | GO:0007186 [G-protein coupled receptor signaling pathway]                              |
|               | <b>10</b> | GO:0008285 [negative regulation of cell proliferation]                                 |
|               | <b>10</b> | GO:0006954 [inflammatory response]                                                     |
|               | <b>9</b>  | GO:0010629 [negative regulation of gene expression]                                    |
| <b>AQP8</b>   | <b>2</b>  | GO:0055085 [transmembrane transport]                                                   |
|               | <b>1</b>  | GO:0071320 [cellular response to cAMP]                                                 |
|               | <b>1</b>  | GO:0006833 [water transport]                                                           |
| <b>PBX4</b>   | <b>9</b>  | GO:0045893 [positive regulation of transcription, DNA-templated]                       |
|               | <b>9</b>  | GO:0006357 [regulation of transcription from RNA polymerase II promoter]               |
|               | <b>3</b>  | GO:0007420 [brain development]                                                         |
|               | <b>3</b>  | GO:0009887 [animal organ morphogenesis]                                                |
|               | <b>2</b>  | GO:0048568 [embryonic organ development]                                               |
| <b>POLR1B</b> | <b>4</b>  | GO:0007566 [embryo implantation]                                                       |
|               | <b>1</b>  | GO:0014029 [neural crest formation]                                                    |
|               | <b>1</b>  | GO:0017126 [nucleologenesis]                                                           |
|               | <b>1</b>  | GO:0009303 [rRNA transcription]                                                        |
| <b>BUB1</b>   | <b>12</b> | GO:0051301 [cell division]                                                             |
|               | <b>8</b>  | GO:0006915 [apoptotic process]                                                         |
|               | <b>8</b>  | GO:0006468 [protein phosphorylation]                                                   |
|               | <b>7</b>  | GO:0008283 [cell proliferation]                                                        |
|               | <b>4</b>  | GO:0007094 [mitotic spindle assembly checkpoint]                                       |
| <b>AURKA</b>  | <b>13</b> | GO:0043066 [negative regulation of apoptotic process]                                  |
|               | <b>12</b> | GO:0051301 [cell division]                                                             |
|               | <b>9</b>  | GO:0010629 [negative regulation of gene expression]                                    |
|               | <b>8</b>  | GO:0006468 [protein phosphorylation]                                                   |
|               | <b>6</b>  | GO:0007052 [mitotic spindle organization]                                              |
| <b>GNG7</b>   | <b>10</b> | GO:0007186 [G-protein coupled receptor signaling pathway]                              |
|               | <b>1</b>  | GO:0008277 [regulation of G-protein coupled receptor protein signaling pathway]        |
| <b>MAD2L1</b> | <b>13</b> | GO:0043066 [negative regulation of apoptotic process]                                  |
|               | <b>12</b> | GO:0051301 [cell division]                                                             |
|               | <b>4</b>  | GO:0007094 [mitotic spindle assembly checkpoint]                                       |
|               | <b>4</b>  | GO:0000070 [mitotic sister chromatid segregation]                                      |
|               | <b>2</b>  | GO:0051444 [negative regulation of ubiquitin-protein transferase activity]             |
| <b>PTGS2</b>  | <b>10</b> | GO:0006954 [inflammatory response]                                                     |
|               | <b>10</b> | GO:0008285 [negative regulation of cell proliferation]                                 |
|               | <b>8</b>  | GO:0009410 [response to xenobiotic stimulus]                                           |
|               | <b>7</b>  | GO:0071456 [cellular response to hypoxia]                                              |
|               | <b>6</b>  | GO:0001525 [angiogenesis]                                                              |

|                |           |                                                                                                                           |
|----------------|-----------|---------------------------------------------------------------------------------------------------------------------------|
| <b>NMU</b>     | <b>10</b> | GO:0007186 [G-protein coupled receptor signaling pathway]                                                                 |
|                | <b>2</b>  | GO:0097009 [energy homeostasis]                                                                                           |
|                | <b>2</b>  | GO:0045987 [positive regulation of smooth muscle contraction]                                                             |
|                | <b>2</b>  | GO:0001659 [temperature homeostasis]                                                                                      |
|                | <b>1</b>  | GO:0060259 [regulation of feeding behavior]                                                                               |
| <b>CDC45</b>   | <b>3</b>  | GO:0006270 [DNA replication initiation]                                                                                   |
|                | <b>3</b>  | GO:0000727 [double-strand break repair via break-induced replication]                                                     |
|                | <b>3</b>  | GO:0006268 [DNA unwinding involved in DNA replication]                                                                    |
|                | <b>2</b>  | GO:0000076 [DNA replication checkpoint]                                                                                   |
|                | <b>1</b>  | GO:1902977 [mitotic DNA replication preinitiation complex assembly]                                                       |
| <b>MCM2</b>    | <b>8</b>  | GO:0006915 [apoptotic process]                                                                                            |
|                | <b>5</b>  | GO:0006260 [DNA replication]                                                                                              |
|                | <b>3</b>  | GO:0006270 [DNA replication initiation]                                                                                   |
|                | <b>3</b>  | GO:0000727 [double-strand break repair via break-induced replication]                                                     |
|                | <b>3</b>  | GO:0006268 [DNA unwinding involved in DNA replication]                                                                    |
| <b>SPP1</b>    | <b>11</b> | GO:0007165 [signal transduction]                                                                                          |
|                | <b>10</b> | GO:0006954 [inflammatory response]                                                                                        |
|                | <b>9</b>  | GO:0045893 [positive regulation of transcription, DNA-templated]                                                          |
|                | <b>4</b>  | GO:0007566 [embryo implantation]                                                                                          |
|                | <b>4</b>  | GO:0007155 [cell adhesion]                                                                                                |
| <b>ASPM</b>    | <b>4</b>  | GO:0007283 [spermatogenesis]                                                                                              |
|                | <b>3</b>  | GO:0008584 [male gonad development]                                                                                       |
|                | <b>3</b>  | GO:0001764 [neuron migration]                                                                                             |
|                | <b>3</b>  | GO:0007051 [spindle organization]                                                                                         |
|                | <b>2</b>  | GO:0021987 [cerebral cortex development]                                                                                  |
| <b>RBM28</b>   | <b>2</b>  | GO:0006397 [mRNA processing]                                                                                              |
|                | <b>1</b>  | GO:0008380 [RNA splicing]                                                                                                 |
| <b>HEATR1</b>  | <b>3</b>  | GO:2000234 [positive regulation of rRNA processing]                                                                       |
|                | <b>3</b>  | GO:0045943 [positive regulation of transcription from RNA polymerase I promoter]                                          |
|                |           | GO:0000462 [maturation of SSU-rRNA from tricistronic rRNA transcript (SSU-rRNA, 5.8S rRNA, LSU-rRNA)]                     |
| <b>WDR75</b>   | <b>2</b>  |                                                                                                                           |
|                | <b>5</b>  | GO:0006364 [rRNA processing]                                                                                              |
|                | <b>3</b>  | GO:0045943 [positive regulation of transcription from RNA polymerase I promoter]                                          |
| <b>CCR2</b>    | <b>3</b>  | GO:2000234 [positive regulation of rRNA processing]                                                                       |
|                | <b>10</b> | GO:0007186 [G-protein coupled receptor signaling pathway]                                                                 |
|                | <b>10</b> | GO:0006954 [inflammatory response]                                                                                        |
|                | <b>8</b>  | GO:0070098 [chemokine-mediated signaling pathway]                                                                         |
|                | <b>5</b>  | GO:0006955 [immune response]                                                                                              |
| <b>GNG2</b>    | <b>5</b>  | GO:0006935 [chemotaxis]                                                                                                   |
|                | <b>10</b> | GO:0007186 [G-protein coupled receptor signaling pathway]                                                                 |
|                | <b>7</b>  | GO:0008283 [cell proliferation]                                                                                           |
|                | <b>1</b>  | GO:0071870 [cellular response to catecholamine stimulus]                                                                  |
|                | <b>1</b>  | GO:0071380 [cellular response to prostaglandin E stimulus]                                                                |
| <b>TMEM270</b> | <b>1</b>  | GO:0007191 [adenylate cyclase-activating dopamine receptor signaling pathway]                                             |
|                | -         | -                                                                                                                         |
|                | <b>7</b>  | GO:0071456 [cellular response to hypoxia]                                                                                 |
| <b>ACAA2</b>   | <b>2</b>  | GO:0006635 [fatty acid beta-oxidation]                                                                                    |
|                | <b>1</b>  | GO:0006695 [cholesterol biosynthetic process]                                                                             |
|                |           | GO:1901029 [negative regulation of mitochondrial outer membrane permeabilization involved in apoptotic signaling pathway] |
|                | <b>1</b>  | GO:1902109 [negative regulation of mitochondrial membrane permeability involved in apoptotic process]                     |
|                | <b>1</b>  |                                                                                                                           |
| <b>PGPEP1L</b> | <b>4</b>  | GO:0006508 [proteolysis]                                                                                                  |
| <b>NOP58</b>   | <b>5</b>  | GO:0006364 [rRNA processing]                                                                                              |
|                | <b>1</b>  | GO:0048254 [snoRNA localization]                                                                                          |

|               |           |                                                                                                                                                                  |
|---------------|-----------|------------------------------------------------------------------------------------------------------------------------------------------------------------------|
| <b>WDR3</b>   | <b>2</b>  | GO:0030490 [maturation of SSU-rRNA]                                                                                                                              |
| <b>RPP40</b>  | <b>2</b>  | GO:0000447 [endonucleolytic cleavage in ITS1 to separate SSU-rRNA from 5.8S rRNA and LSU-rRNA from tricistronic rRNA transcript (SSU-rRNA, 5.8S rRNA, LSU-rRNA)] |
|               | <b>1</b>  | GO:1905267 [endonucleolytic cleavage involved in tRNA processing]                                                                                                |
|               | <b>1</b>  | GO:0001682 [tRNA 5'-leader removal]                                                                                                                              |
| <b>GTPBP4</b> | <b>10</b> | GO:0008285 [negative regulation of cell proliferation]                                                                                                           |
|               | <b>4</b>  | GO:0000079 [regulation of cyclin-dependent protein serine/threonine kinase activity]                                                                             |
|               | <b>3</b>  | GO:0001649 [osteoblast differentiation]                                                                                                                          |
|               | <b>2</b>  | GO:0050821 [protein stabilization]                                                                                                                               |
|               | <b>2</b>  | GO:0030336 [negative regulation of cell migration]                                                                                                               |
| <b>WDR43</b>  | <b>5</b>  | GO:0006364 [rRNA processing]                                                                                                                                     |
|               | <b>3</b>  | GO:0045943 [positive regulation of transcription from RNA polymerase I promoter]                                                                                 |
|               | <b>3</b>  | GO:2000234 [positive regulation of rRNA processing]                                                                                                              |
|               | <b>2</b>  | GO:0000462 [maturation of SSU-rRNA from tricistronic rRNA transcript (SSU-rRNA, 5.8S rRNA, LSU-rRNA)]                                                            |
|               | <b>1</b>  | GO:0034243 [regulation of transcription elongation from RNA polymerase II promoter]                                                                              |
| <b>POLR1C</b> | <b>1</b>  | GO:0006360 [transcription from RNA polymerase I promoter]                                                                                                        |
|               | <b>1</b>  | GO:0006383 [transcription from RNA polymerase III promoter]                                                                                                      |

\* The "pathway counts" is the number of times each stated pathway was counted among all the biological pathways to which any of the individual genes listed in Tables 1 and 2 belong.

\*\* Up to 5 pathways shown.

**Table S3.** Downregulated genes in CRC.

| Gene    | Protein                                                        | UniProt ID | Protein Name   |
|---------|----------------------------------------------------------------|------------|----------------|
| NDRG1   | N-myc downstream-regulated gene 1 protein                      | E5RK17     | (E5RK17_HUMAN) |
| PRKACV  | cAMP-dependent protein kinase catalytic subunit beta           | P22694     | (KAPCB_HUMAN)  |
| CAB39   | Calcium-binding protein 39                                     | Q9Y376     | (CAB39_HUMAN)  |
| CFLAR   | CASP8 and FADD-like apoptosis regulator                        | O15519     | (CFLAR_HUMAN)  |
| CTSC    | Cathepsin C                                                    | H0YCY8     | (H0YCY8_HUMAN) |
| THBS1   | Thrombospondin-1                                               | P07996     | (TSP1_HUMAN)   |
| TRAPPC3 | Trafficking protein particle complex subunit 3                 | O43617     | (TPPC3_HUMAN)  |
| EIF4E3  | Eukaryotic translation initiation factor 4E type 3             | Q8N5X7     | (IF4E3_HUMAN)  |
| PTK6    | Protein-tyrosine kinase 6                                      | Q13882     | (PTK6_HUMAN)   |
| PHLPP2  | PH domain leucine-rich repeat-containing protein phosphatase 2 | Q6ZVD8     | (PHLP2_HUMAN)  |
| CBX7    | Chromobox protein homolog 7                                    | O95931     | (CBX7_HUMAN)   |
| LPAR1   | Lysophosphatidic acid receptor 1                               | Q92633     | (LPAR1_HUMAN)  |
| RCL1    | RNA 3'-terminal phosphate cyclase-like protein                 | Q9Y2P8     | (RCL1_HUMAN)   |
| ZG16    | Zymogen granule membrane protein 16                            | O60844     | (ZG16_HUMAN)   |
